# Supplementary material
Source: Springer Nature journal article supplement (https://www.springermedizin.de/resource/supplementary/12974_2011_468_MOESM7_ESM.pdf/9601376)

**A****Cytoplasmic****Nuclear**

BSA BSA+LPS SNCA SNCA+LPS BSA BSA+LPS SNCA SNCA+LPS

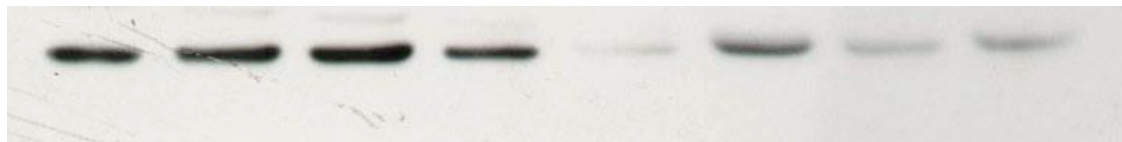

Actin

HCDA1

**B**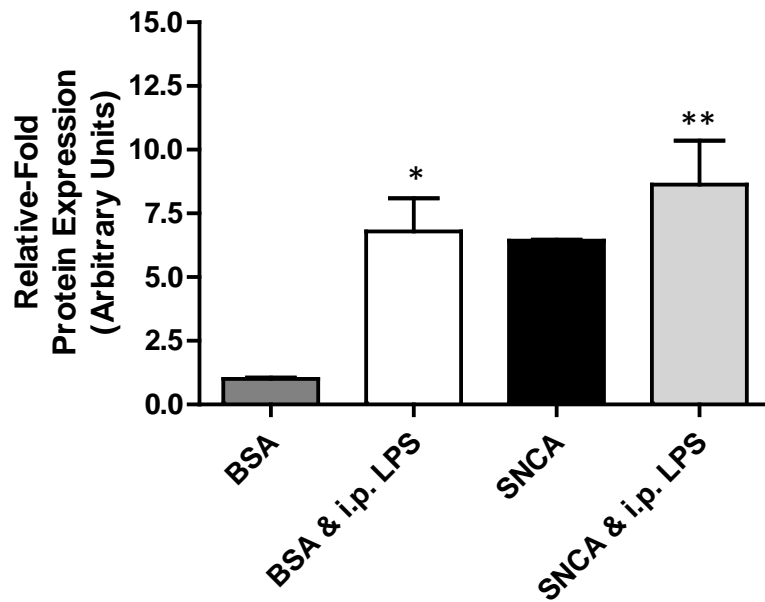

Supplement: MOESM7 [file 9601376]
